# Supplementary material
Source: PubMed Central journal article supplement (PMC5777613)
Supplement: NIHMS933415-supplement-Supplementary_Table_1.pdf [file NIHMS933415-supplement-Supplementary_Table_1.pdf]

**Supplemental Table 1.** Adjusted mean differences\* in minutes of sleep duration and log odds<sup>^</sup> of daytime sleepiness associated with a 1 Standard Deviation increase in neighborhood characteristics

|                           | <b>Model 1<br/>Difference<br/>(95% CI)</b> | <b>Model 2<br/>Difference<br/>(95% CI)</b> | <b>Model 3<br/>Difference<br/>(95% CI)</b> |
|---------------------------|--------------------------------------------|--------------------------------------------|--------------------------------------------|
| <b>Minutes of Sleep</b>   |                                            |                                            |                                            |
| Neighborhood Disadvantage | 2.26<br>(-3.02, 7.54)                      | 0.45<br>(-5.10, 6.00)                      | 1.39<br>(-4.14, 6.91)                      |
| Self-reported Safety      | 2.30<br>(-2.96, 7.57)                      | 4.54<br>(-0.78, 9.87) <sup>b</sup>         | 3.95<br>(-1.36, 9.27)                      |
| Crime                     | 0.84<br>(-4.85, 6.52)                      | -1.49<br>(-7.71, 4.73)                     | -0.37<br>(-6.57, 5.82)                     |
| <b>Daytime Sleepiness</b> |                                            |                                            |                                            |
| Neighborhood Disadvantage | -0.03<br>(-0.16, 0.11)                     | -0.04<br>(-0.19, 0.11)                     | -0.11<br>(-0.26, 0.05)                     |
| *Self-reported Safety     | -0.23<br>(-0.37, -0.09) <sup>a</sup>       | -0.22<br>(-0.36, -0.08) <sup>a</sup>       | -0.20<br>(-0.34, 0.05) <sup>a</sup>        |
| Crime                     | 0.00<br>(-0.15, 0.15)                      | 0.03<br>(-0.14, 0.20)                      | -0.04<br>(-0.23, 0.15)                     |

Model 1 is adjusted for age and sex. Model 2 is adjusted for education, income and employment status, in addition to the factors in adjusted for in model 1. Model 3 is adjusted for depressive symptoms, body mass index, diabetes, and hypertension, in addition to the factors adjusted for in model 2. <sup>a</sup> $P < 0.01$ ; <sup>b</sup> $P < 0.10$
